# Supplementary material for: Advances in Land Surface Model-based Forecasting: A Comparison of LSTM, Gradient Boosting, and Feedforward Neural Networks as Prognostic State Emulators in a Case Study with ECLand
Source: Copernicus journal article supplement (doi:10.5194/egusphere-2024-2081), 2024-08-12
Supplement: Supplementary file 2 [file egusphere-2024-2081-supplement.pdf]

# 1 S Supplementary Material

2

## 3 S1 Data base

4

### 5 S2.1 European subregions for horizons computation

6

7 A northern European subset was selected on Southern Scandinavia with a grid box on  
8 minimum and maximum latitudes of 55 and 71 degree respectively and a minimum and  
9 maximum longitude of 5 and 20 degree respectively. This resulted in a subset of 755 grid  
10 cells. For the southern European region, a grid box was created over France with minimum  
11 and maximum latitudes of 41.5 and 51.1 degree respectively and a minimum and maximum  
12 longitude of -5.1 and 6 degree respectively. Summary statics for the prognostic state variables  
13 in these regions are listed in table S1.

14

15 *Table S1: Exemplary summary statistics of the seven prognostic target variables over two European training data*  
16 *subsets, northern and southern. Mean, standard deviation and their ratio (Signal-to-noise ratio, SNR) are aggregated*  
17 *over times and grid cells.*

|              | Northern Europe |               |         | Southern Europe |               |         |
|--------------|-----------------|---------------|---------|-----------------|---------------|---------|
|              | Mean            | Standard dev. | SNR     | Mean            | Standard dev. | SNR     |
| <b>SWVL1</b> | 0.2858          | 0.0465        | 6.399   | 0.2929          | 0.0905        | 3.3495  |
| <b>SWVL2</b> | 0.2802          | 0.0433        | 6.7156  | 0.2949          | 0.0807        | 3.7471  |
| <b>SWVL3</b> | 0.2685          | 0.0449        | 6.1867  | 0.2905          | 0.0688        | 4.3294  |
| <b>STL1</b>  | 278.1943        | 6.2549        | 45.6081 | 285.026         | 6.9303        | 41.67   |
| <b>STL2</b>  | 278.0838        | 5.6185        | 50.9871 | 284.9675        | 6.007         | 48.0569 |
| <b>STL3</b>  | 277.8869        | 4.4763        | 65.1102 | 284.847         | 4.8378        | 59.6688 |
| <b>SNOWC</b> | 36.5848         | 37.9657       | 0.889   | 2.7402          | 9.5118        | 0.1722  |

18

19

20

21

## 22 S2 Model development

23

### 24 S2.1 LSTM

25

#### 26 S2.1.1 Architecture and Hyperparameter selection

27

28

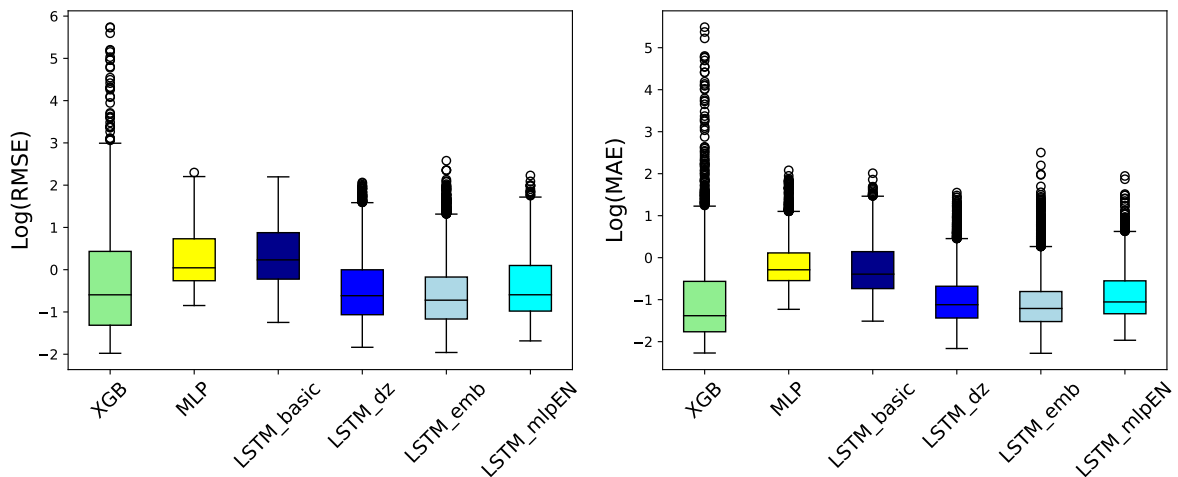

29

30 *Figure S1: LSTM architecture development. LSTM\_basic considers prognostic state variables in the encoder as input,*  
31 *LSTM\_dz adds and incremental term in the loss function, LSTM\_emb encodes prognostic state variables to inform*  
32 *encoder hidden and cell states and LSTM\_mlpEN uses an MLP encoder to inform the hidden states of the LSTM*  
33 *decoder.*

34 The coarse architectural modules of the LSTM were manually selected. In a seeded  
35 experiment, we (1) added the first differences to the loss function, (2) added an embedding  
36 layer that transfers prognostic states to the initial hidden states of an LSTM encoder, (3)  
37 tested an MLP as encoder to the LSTM decoder (see figure S1). While we accepted the  
38 methodology of (1) and (2), we rejected (3) and continued with an LSTM encoder network.  
39 Detailed architectural choices were made with the Bayesian hyperparameter tuning framework  
40 Optuna (Akiba et al., 2019). The best performance was reached with equal parametric  
41 capacities in the encoder and decoder part. The final LSTM thus has a hidden size of 200 and  
42 in each layer with a depth of 3 in the encoder and decoder part. The parts are connected by a  
43 hidden and a cell adapter that consist each of a single linear layer that transfers the hidden  
44 and cell state from the encoder to the decoder, performing width.  
45 The hyperparameters for training were a dropout of 0.1265, a learning rate of 0.0005 and  
46 weight decay of 0.0001.

47  
48  
49  
50  
51  
52  
53  
54  
55  
56  
57  
58  
59  
60  
61  
62  
63  
64  
65  
66  
67  
68  
69  
70  
71  
72  
73  
74

|   |                |        |        |
|---|----------------|--------|--------|
| 1 | hidden_encoder | Linear | 5.8 K  |
| 2 | cell_encoder   | Linear | 5.8 K  |
| 3 | lstm_encoder   | LSTM   | 824 K  |
| 4 | hidden_adapter | Linear | 40.2 K |
| 5 | cell_adapter   | Linear | 40.2 K |
| 6 | lstm_decoder   | LSTM   | 824 K  |
| 7 | mlp_decoder    | Linear | 1.4 K  |

1.7 M Trainable params  
0 Non-trainable params  
1.7 M Total params  
6.942 Total estimated model params size (MB)

### S2.1.2 Training Leadtime

The forget gate mechanism allows LSTMs to store information over long time sequences without the loss of old information (e.g. (Nearing et al., 2024)). We conducted a seeded experiment on the effect of the training lead time in the decoder part on the LSTMs predictive accuracy within the capacity of our computational resources. At the exact same hyperparameter setting, the model was trained at six different lead times for 220 epochs. Note that lead times are reported in time steps on the 6-hourly resolution, i.e. a lead time of ten is equivalent to a 2.5 days forecast, a lead time of 20 to 5 days, etc. All models converged in the training period. While predictive accuracy increases at longer training lead times, so does the training runtime (see table S1 and figure S3). The training lead time for results we show in the main manuscript was 40 on the European and 60 on the continental scale.

75

76 *Table S2: Summary of runtimes and total mean predictive scores at different training lead times. Training was*

77 *conducted on 2 GPUs, Evaluation on 1 GPU. Runtimes are reported in minutes.*

| Training Leadtime | Training Runtime | Evaluation Runtime | Total RMSE | Total MAE | Total R2 |
|-------------------|------------------|--------------------|------------|-----------|----------|
| 10                | 420.72           | 0.016              | 1.6520     | 0.9929    | 0.9991   |
| 20                | 664.27           | 0.009              | 1.3992     | 0.8012    | 0.9991   |
| 30                | 905.47           | 0.009              | 1.1084     | 0.5958    | 0.9992   |
| 40                | 1289.27          | 0.008              | 0.9138     | 0.4983    | 0.9994   |
| 50                | 1954.62          | 0.009              | 0.7411     | 0.3691    | 0.9997   |
| 60                | 2338.86          | 0.009              | 0.6918     | 0.3459    | 0.9998   |

78

79

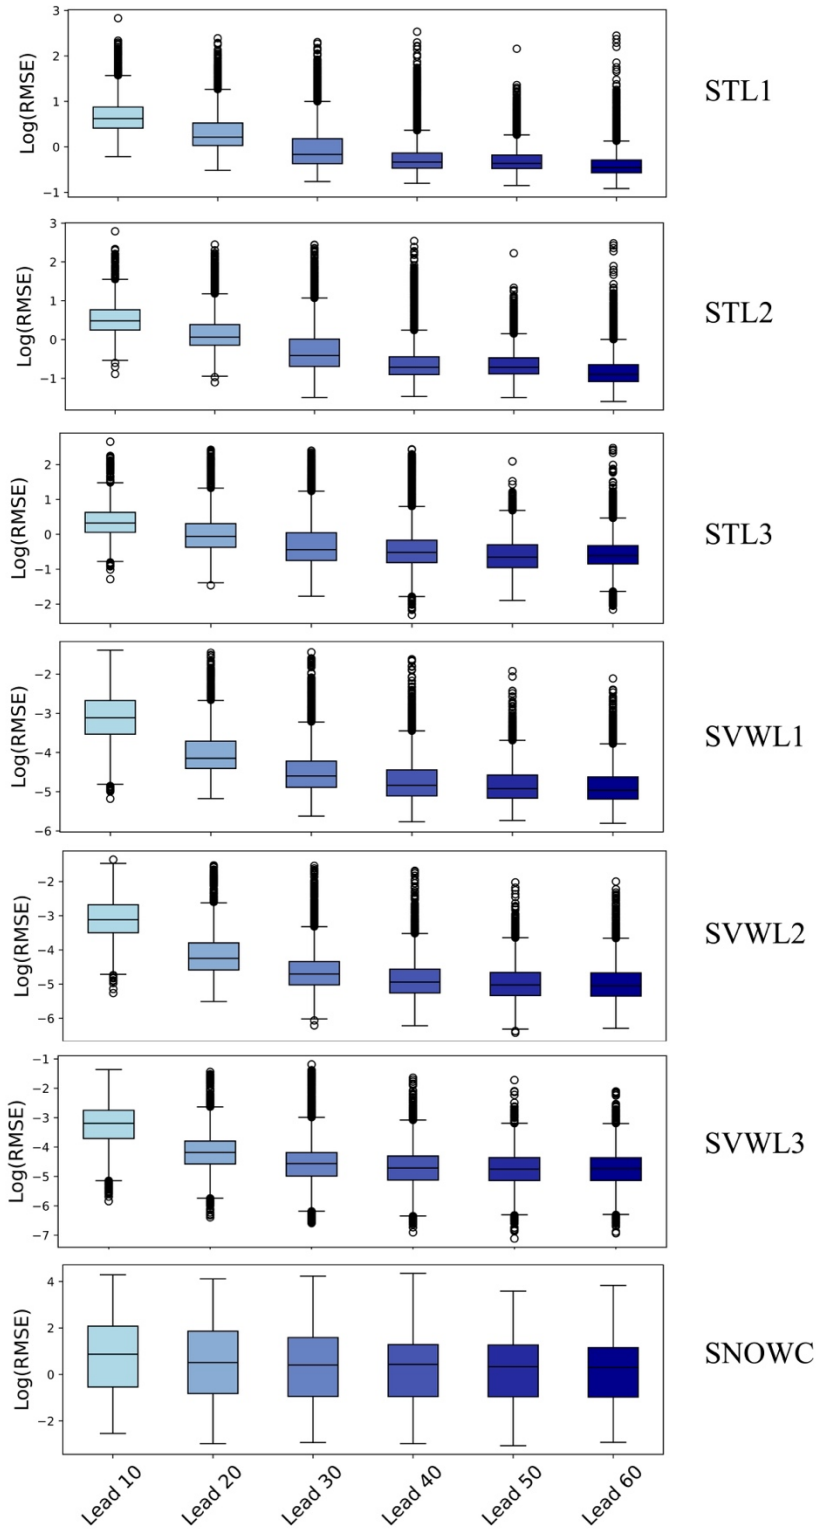

80

81

82 *Figure S2: Targetwise predictive accuracy by training at different lead times.*

83

84 **S2.1.2 Encoder sequence length**

85

86 Like the experiment on the training lead time, we conducted a seeded experiment on the  
87 effect of encoder sequence length on predictive accuracies at a training lead time of 40.  
88 However, in contrast to varying the training lead time, changing the encoder sequence will  
89 change the model structure(Hochreiter & Schmidhuber, 1997). The effect not being as clear  
90 as for training lead time, we may hypothesise an advantage of shorter sequence length for the  
91 s oil related variables (see figure S3). Models that produced results in the main manuscript  
92 were trained with encoder sequence lengths of 24.

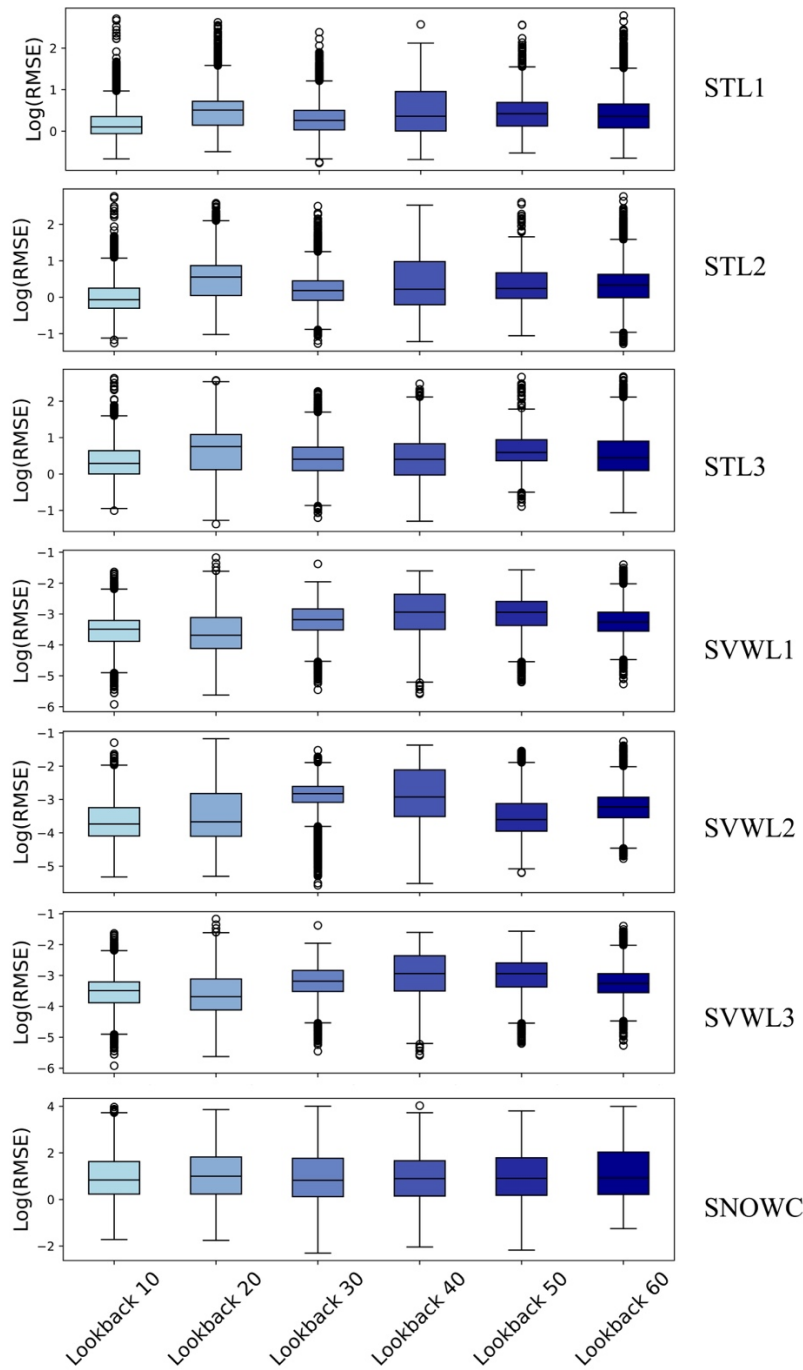

93

94 *Figure S3: Targetwise predictive accuracy by training with different lookback times, i.e. encoder sequence lengths.*

## 95 **S2.2 MLP**

96

### 97 **S2.2.1 Methodology**

98

99 The multilayer perceptron is a neural network regression-type model that approximates a

100 non-linear function  $f: x \rightarrow y$ , where  $x$  in this study is a vector of static, dynamic and

101 prognostic state variables, and  $y$  the vector of prognostic state variables. The optimal function  
102  $f$  representing this mapping is unknown and its best possible approximation  $f^*(x)$  is found  
103 in a stochastic gradient-based optimization procedure. In practice,  $n$  non-linear functions are  
104 chained to a feed-forward neural network to create a hierarchically structured latent space  
105 with so-called hidden layers, whereby each  $j$ -th hidden layer of the network can be expressed  
106 as

$$107 \quad y_j = \varphi_j\left(\sum_i x_i A_{j,i} + b_j\right).$$

108 Here,  $A_{j,i}$  constitutes the weight matrix, i.e. the networks parameter,  $b_j$  the bias vector, i.e. an  
109 estimated intercept, and  $\varphi_j$  a non-linear activation function. The activation function is here  
110 the Rectified-Linear Unit (ReLU) that is defined as

$$111 \quad \varphi := \max(y, 0).$$

112 In a hidden layer, the input  $x_i$  is mapped to a predetermined number of hidden nodes, i.e. the  
113 layers' size, determined by the second dimension in  $A_{j,i}$ . The transformation with  $\varphi_j$  returns a  
114 weighted version of the node. When weighted to zero, a node is dead unless regularized by  
115 the bias. The MLP is trained with dropout, referring to an additional regularization technique  
116 that applies a random binary mask to all input and hidden nodes of the network at each  
117 training step, where a node with the zero at the mask is dead in this training step. The  
118 probability of ones in the mask is defined as a hyperparameter (see below) (Goodfellow et al.,  
119 2016).

120

### 121 **S2.2.2 Architecture and Hyperparameters**

122

123 The MLP has four hidden layers of sizes 122, 47, 103 and 117. It is trained with a learning  
124 rate of 0.00093, dropout of 0.18526 and a weight decay of 0.00013. The batch size and  
125 training rollout were determined by GPU memory and are 4 and 4 respectively. The total  
126 numbers of trainable parameters in the MLP is 28.8K.

127

### 128 **S2.2 XGB**

129

130 XGB was trained with a learning rate of 0.3, a maximum depth of ten and 256 trees. In  
131 contrast to neural network hyperparameter optimization, only a manual exploration on tuning  
132 the learning rate and depth was conducted.



133

134

135 **S3 Model performances**

136

137 **S3.1 Model development: Europe**

138

139 **S3.1.1 Objective forecast accuracies**

140

141 All emulators approximated the numerical model with high total scores on average, i.e.  
142  $R^2$  values larger than 0.99, MAEs smaller than 1 and RMSE smaller than approximately 1.60. The  
143 LSTM scored highest across all metrics, followed by XGB and then MLP, even though the  
144 latter got second place in RMSE. LSTM improved in MAE by 50% towards XGB (see table  
145 S2). These results differentiate for individual target variables. LSTM shows specifically  
146 strong performance across scores in forecasting soil water volume.

147

148

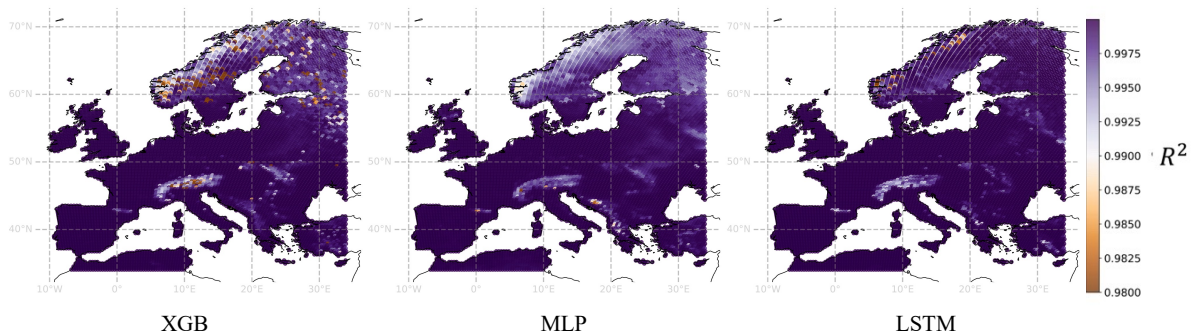

149

150 *Figure S4: Mean R-squared aggregated per grid cells over 6-hourly lead times on the European subset for model*  
151 *development.*

152

153

154

155

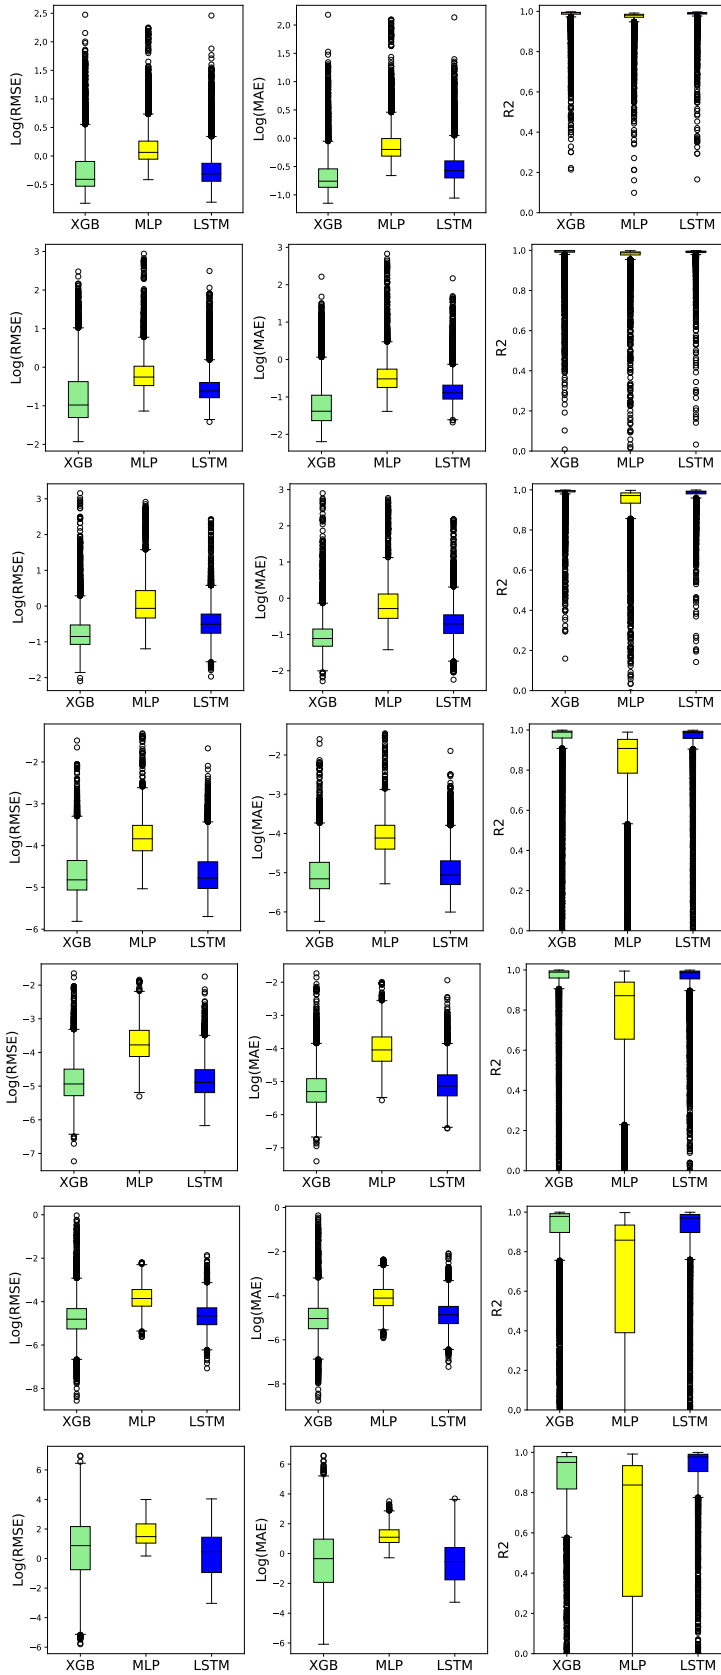

156

157

158 *Figure S5: Total distribution of mean scores, aggregated over 6-hourly lead times by grid cell, variability here thus*  
 159 *refers to performance differences among grid cells.*

160 *Table S3: Emulator total mean scores, aggregated over variables, time and space.*

| Variable      | Model | RMSE          | MAE           | R <sup>2</sup> |
|---------------|-------|---------------|---------------|----------------|
| All variables | XGB   | 1.6035        | 0.8091        | 0.9960         |
|               | MLP   | 1.6013        | 0.9611        | 0.9991         |
|               | LSTM  | <b>0.8507</b> | <b>0.4361</b> | <b>0.9996</b>  |

161 *Table S4: Emulator mean scores on soil water volume forecasts for the European subset, aggregated over space and*  
 162 *time.*

| Variable          | Layer | Model | RMSE          | MAE           | R <sup>2</sup> |
|-------------------|-------|-------|---------------|---------------|----------------|
| Soil water volume | 1     | XGB   | 0.0122        | 0.0084        | 0.84420        |
|                   |       | MLP   | 0.0249        | 0.0192        | 0.7340         |
|                   |       | LSTM  | <b>0.0114</b> | <b>0.0083</b> | <b>0.8655</b>  |
|                   | 2     | XGB   | 0.0104        | <b>0.0070</b> | 0.8512         |
|                   |       | MLP   | 0.0280        | 0.0216        | 0.5781         |
|                   |       | LSTM  | <b>0.0097</b> | 0.0073        | <b>0.8543</b>  |
|                   | 3     | XGB   | 0.0149        | 0.0112        | 0.6426         |
|                   |       | MLP   | 0.0252        | 0.0197        | 0.2380         |
|                   |       | LSTM  | <b>0.0114</b> | <b>0.0092</b> | <b>0.7379</b>  |

163 *Table S5: Emulator mean scores on soil temperature forecasts for the European subset, aggregated over space and*  
 164 *time.*

| Variable         | Layer | Model | RMSE          | MAE           | R <sup>2</sup> |
|------------------|-------|-------|---------------|---------------|----------------|
| Soil temperature | 1     | XGB   | 0.8730        | <b>0.5735</b> | <b>0.9750</b>  |
|                  |       | MLP   | 1.2629        | 0.9601        | 0.9352         |
|                  |       | LSTM  | <b>0.8450</b> | 0.6347        | 0.9642         |
|                  | 2     | XGB   | <b>0.6449</b> | <b>0.3843</b> | <b>0.9721</b>  |
|                  |       | MLP   | 0.9984        | 0.7580        | 0.3130         |
|                  |       | LSTM  | 0.6563        | 0.4852        | 0.9480         |
|                  | 3     | XGB   | <b>0.6221</b> | <b>0.4368</b> | <b>0.9126</b>  |
|                  |       | MLP   | 1.3464        | 1.0020        | -0.5478        |
|                  |       | LSTM  | 0.7530        | 0.5884        | -0.5807        |

165 *Table S6: Emulator mean scores on snow cover forecasts for the European subset, aggregated over space and time.*

| Variable   | Layer | Model | RMSE   | MAE    | R <sup>2</sup> |
|------------|-------|-------|--------|--------|----------------|
| Snow cover | top   | XGB   | 9.0471 | 4.2423 | <b>0.5325</b>  |

|  |      |               |               |        |
|--|------|---------------|---------------|--------|
|  | MLP  | 7.5232        | 3.9469        | 0.4383 |
|  | LSTM | <b>3.6676</b> | <b>1.3196</b> | 0.4345 |

166

167

168

169

170 **S3.1 Model testing: Europe**

171

172 **S3.2.1 Quantile Correlations**

173

174 We visualised quantile correlations for each prognostic state variable. The mean and standard  
 175 deviation of quantiles were computed in 10% steps for emulator and ECland forecasts and  
 176 plotted against each other. The results highlight the state values where model predictions  
 177 align perfectly, i.e. quantiles are found on the correlation line, and where the emulator  
 178 overestimate (quantiles above regression line) or underestimate (quantiles below regression  
 179 line) ECland prognostic states (see figure S6).

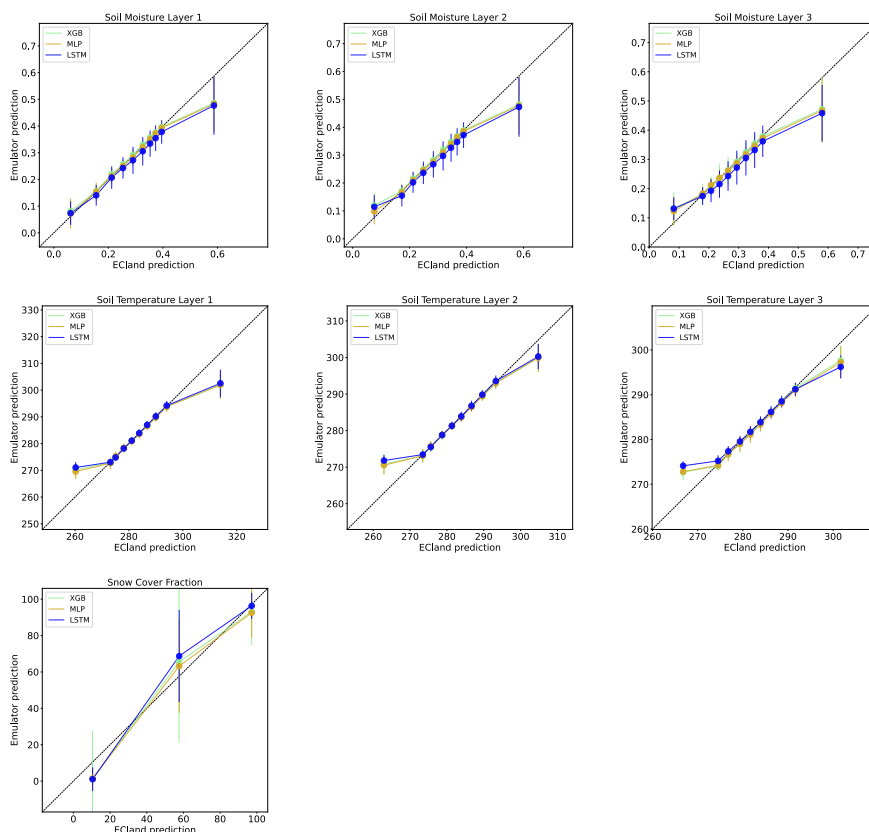

180

181 *Figure S6: Quantile correlations for all prognostic target variables and all emulators. Emulator quantile predictions are*  
 182 *on the y-axis, ECland predictions on the x-axis. The dashed black line indicates their perfect correlation.*



184 **S4 Evaluation**

185

186 **S4.1 Forecast horizons: climatology**

187

188 Below we show examples of forecast horizons computed for three single prognostic state  
189 variables, soil water volume and temperature at layer one and snow cover (figures S7-9).

190 Disentangling these highlights at the example of snow cover that in aggregating the anomaly  
191 correlation over prognostic state variables, negative and positive effects may cancel each  
192 other out: the snow cover limitation in the southern European subregion for the MLP  
193 forecasts is not as visible in the total horizons (see main manuscript).

194

SWVL1

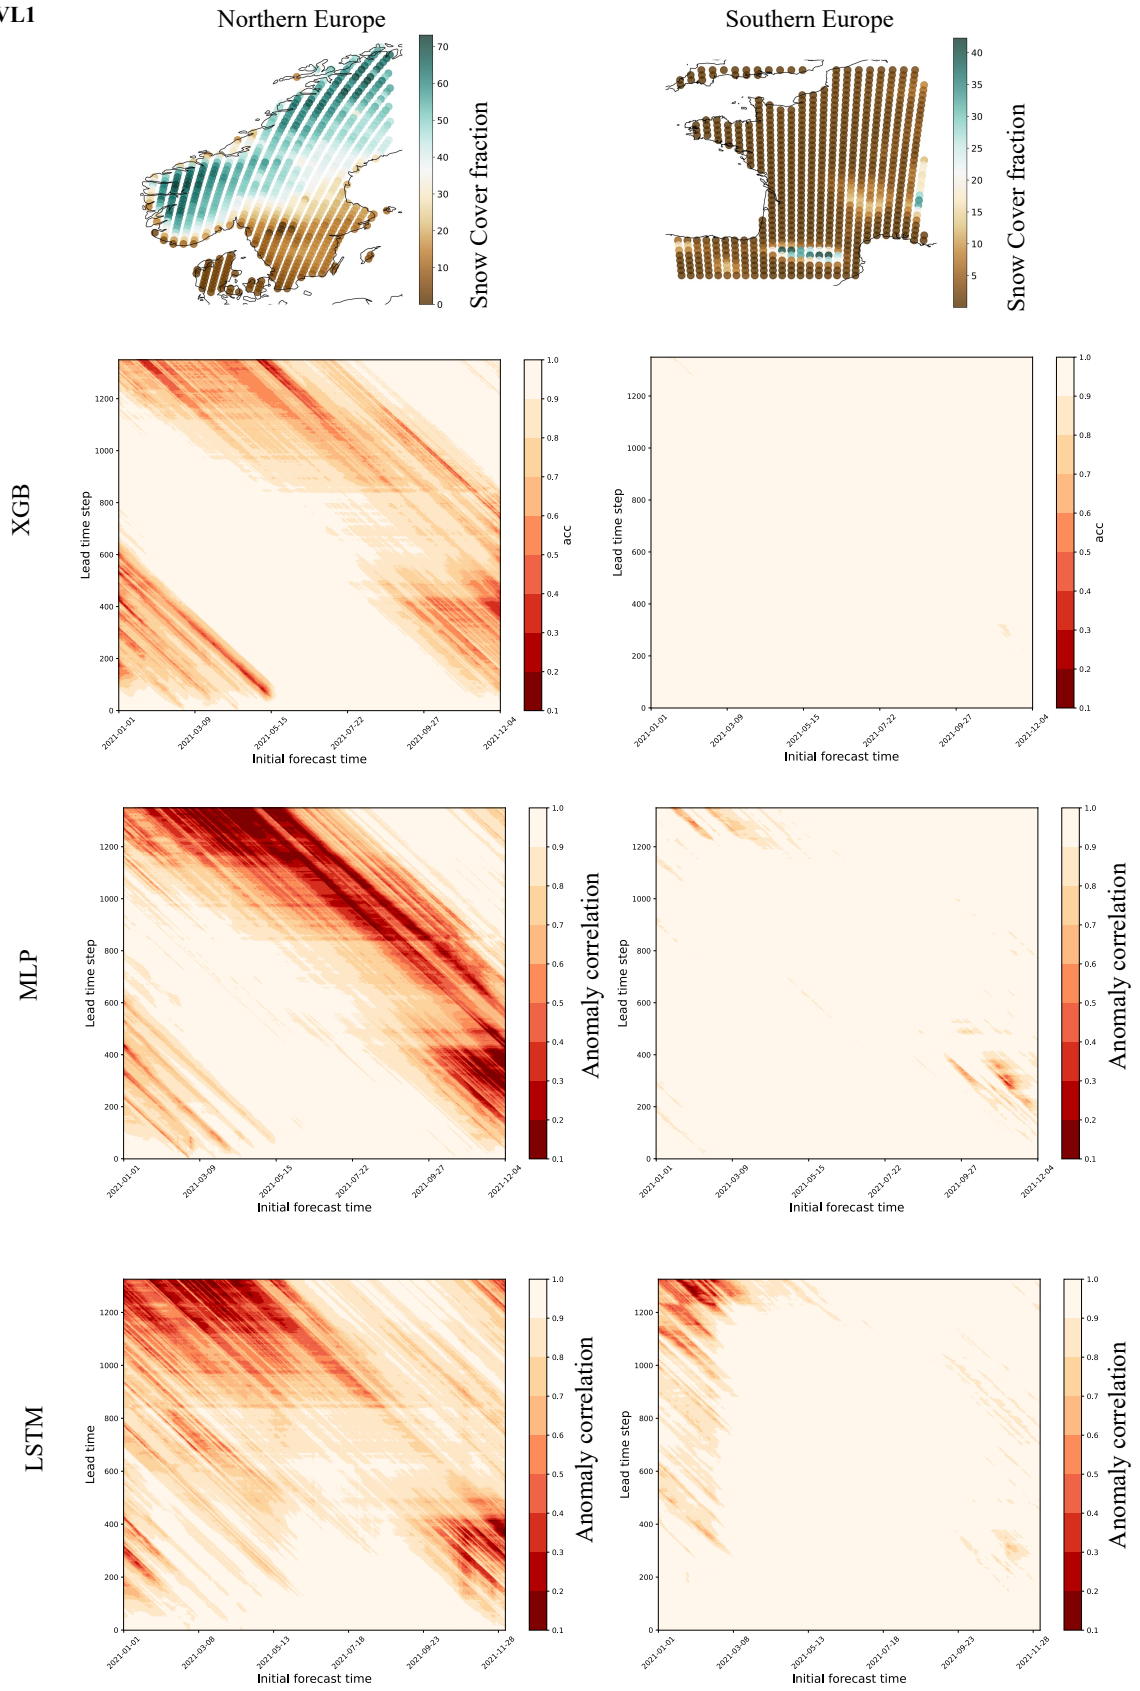

195

196 *Figure S7: Forecast horizons for Soil water volume layer 1.*



STL1

Northern Europe

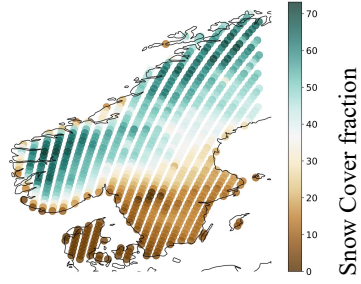

Southern Europe

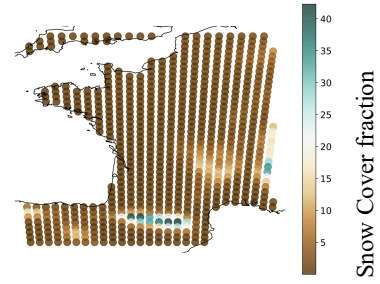

XGB

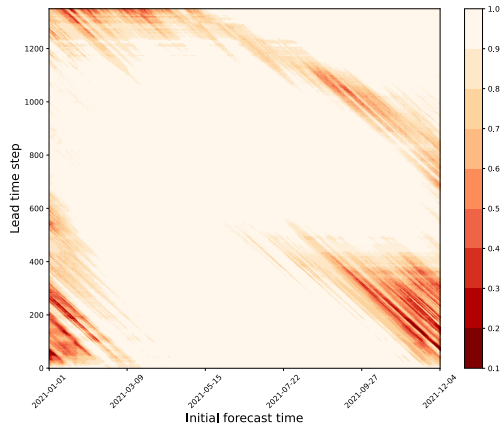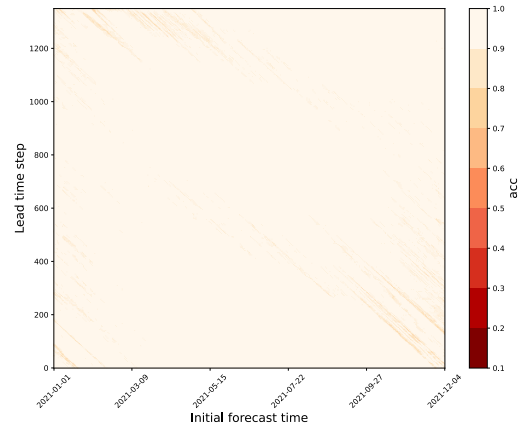

MLP

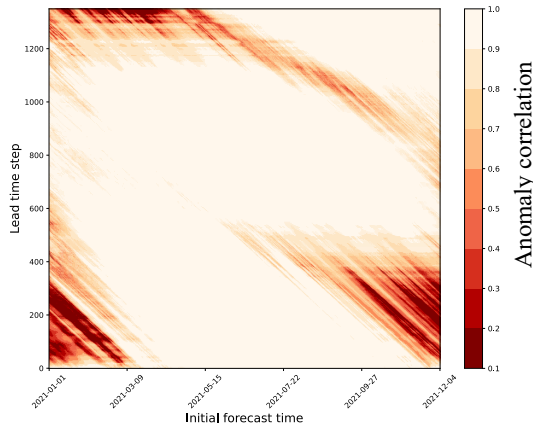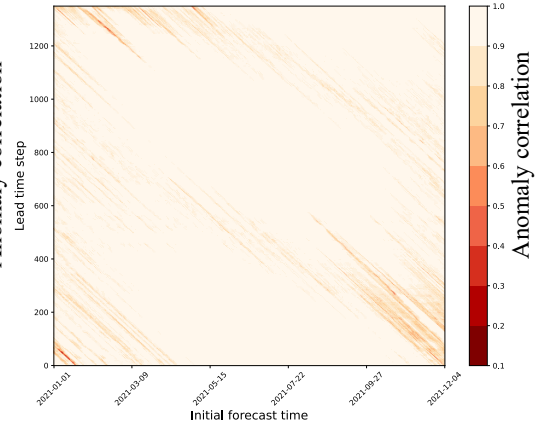

LSTM

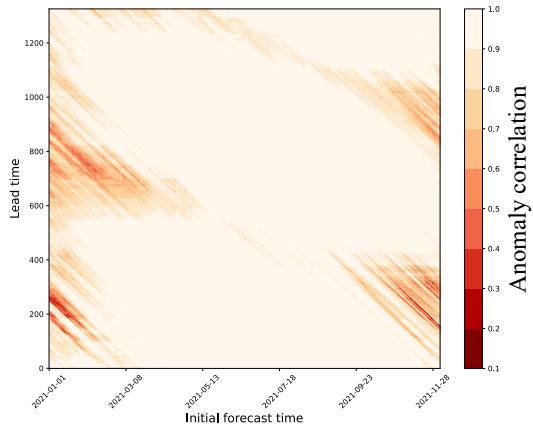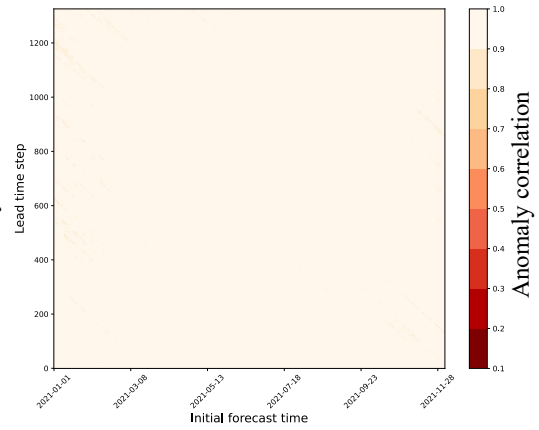

SNOWC

Northern Europe



Southern Europe



XGB

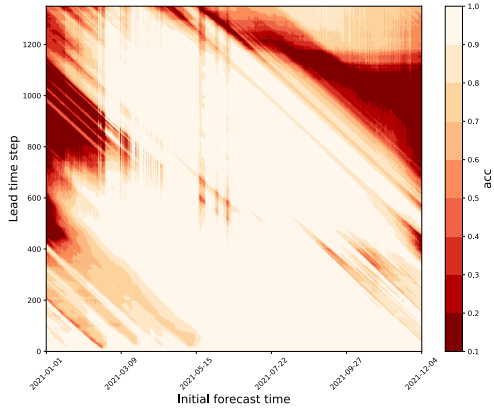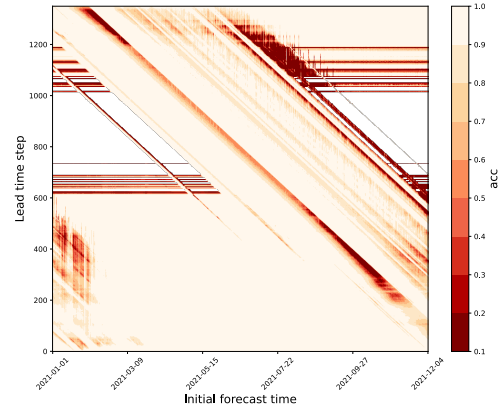

MLP

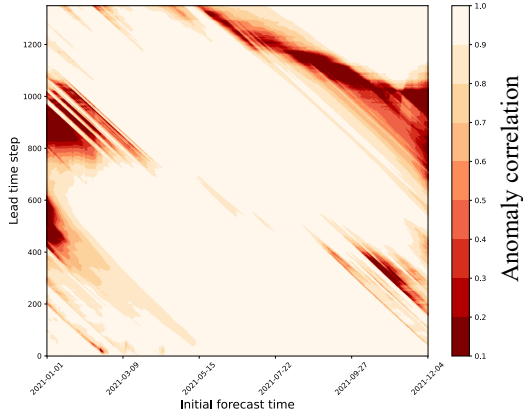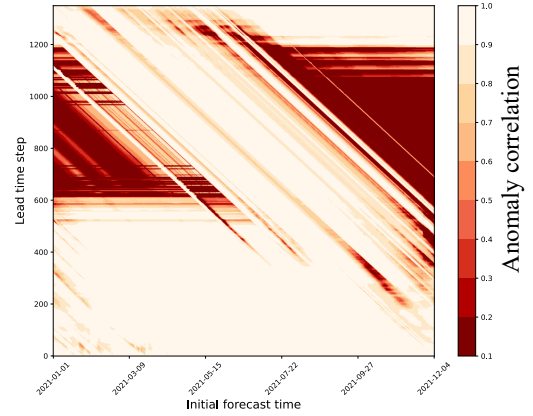

LSTM

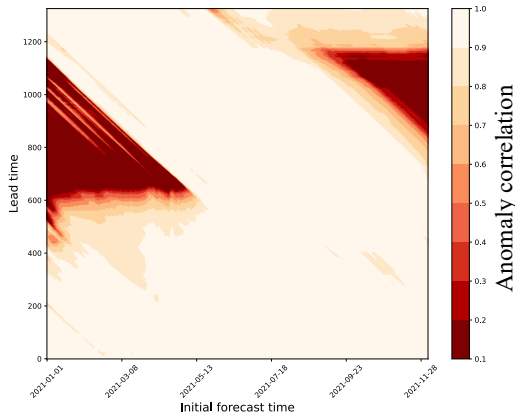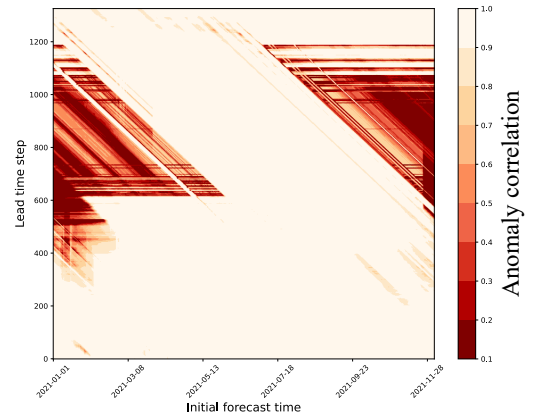

202

203 *Figure S9: Forecast horizons snow cover.*

### 204 **S4.2 Time series sample: Northern Europe**

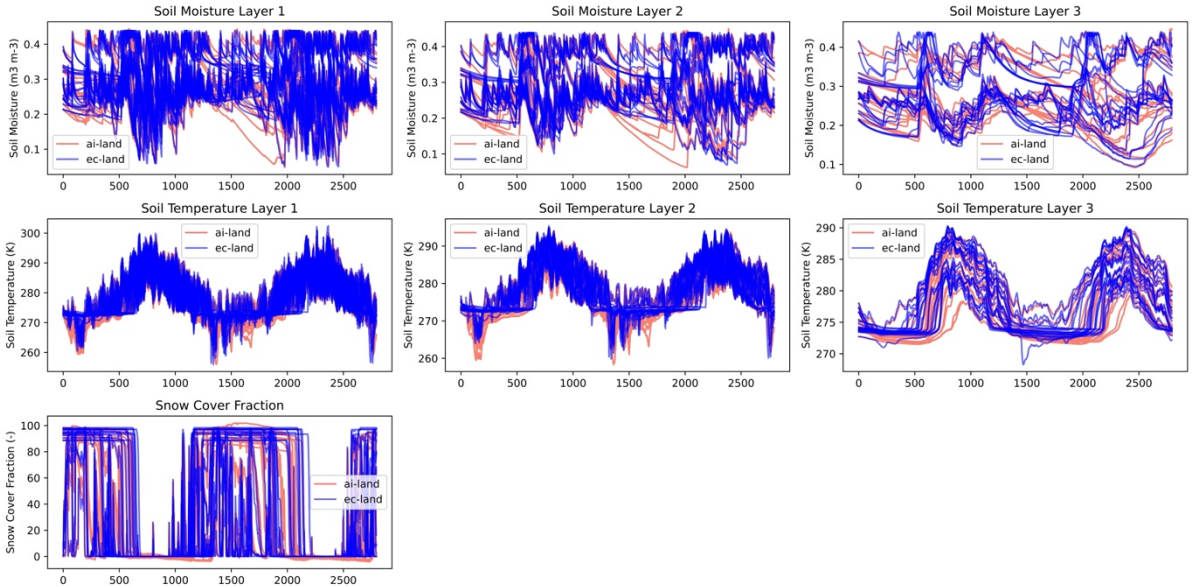

205

206 *Figure S10: MLP forecast on two test years 2021, 2022 for a random selection of grid cells from the northern*

207 *European region.*

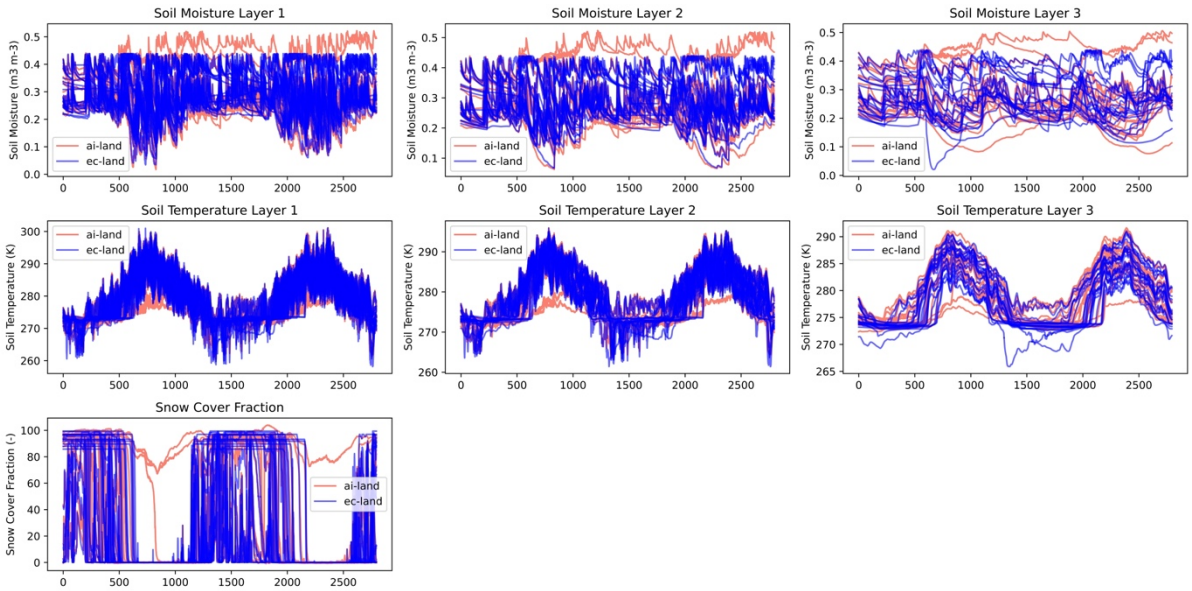

208

209 *Figure S11: LSTM forecast on two test years 2021, 2022 for a random selection of grid cells from the northern*

210 *European region.*

211

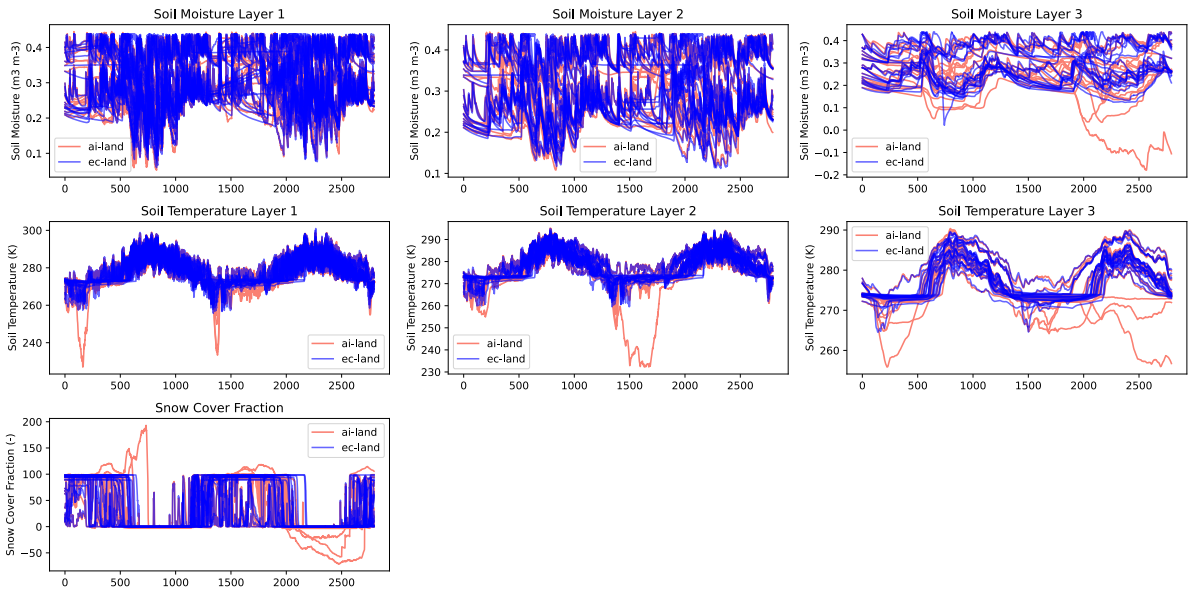

212

213 *Figure S12: XGB forecast on two test years 2021, 2022 for a random selection of grid cells from the northern*

214 *European region.*

215

216 **S4.1 Model extrapolation: Globe, low-resolution (TCO199)**

217

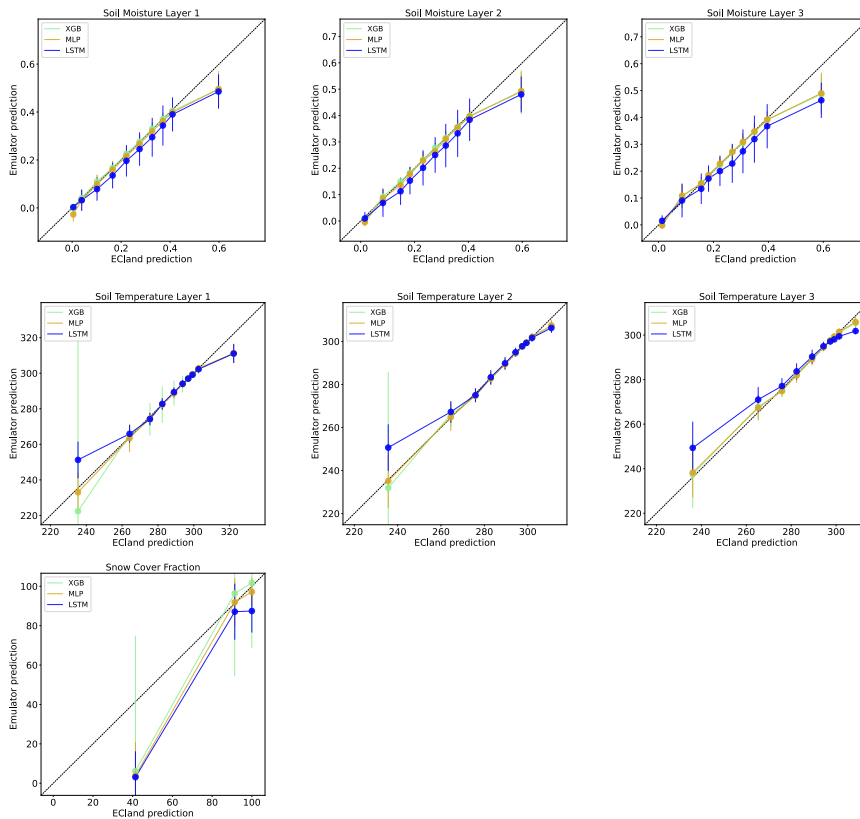

218

219 *Figure S13: Quantile correlations, visualised as described in section 3.2.1 for continental model testing.*

## A. Soil temperature (L1)

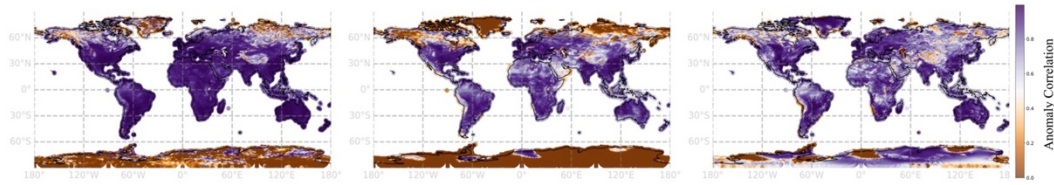

A.1 XGB

A.2 MLP

A.3 LSTM

## B. Soil moisture (L1)

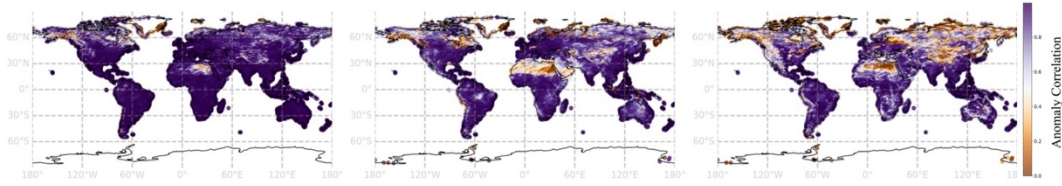

B.1 XGB

B.2 MLP

B.3 LSTM

## C. Snow Cover

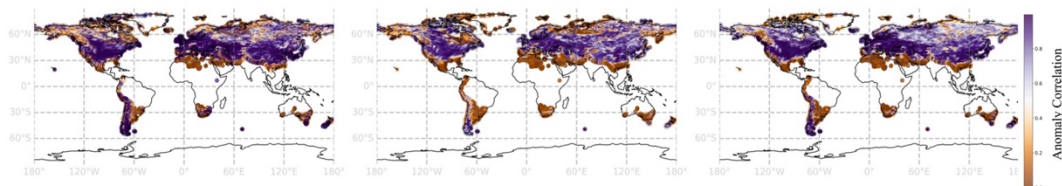

C.1 XGB

C.2 MLP

C.3 LSTM

220

221 *Figure S14: Global distribution of Anomaly Correlation for three prognostic state variables. Uncoloured areas indicate*

222 *regions where the ACC is not defined*

223

224

225 **References**

226

227 Akiba, T., Sano, S., Yanase, T., Ohta, T., & Koyama, M. (2019). Optuna: A Next-generation  
228 Hyperparameter Optimization Framework. *Proceedings of the 25th ACM SIGKDD  
229 International Conference on Knowledge Discovery & Data Mining*, 2623–2631.  
230 <https://doi.org/10.1145/3292500.3330701>

231 Goodfellow, I., Bengio, Y., & Courville, A. (2016). *Deep learning*. The MIT Press.

232 Hochreiter, S., & Schmidhuber, J. (1997). Long Short-Term Memory. *Neural  
233 Computation*, 9(8), 1735–1780. <https://doi.org/10.1162/neco.1997.9.8.1735>

234 Nearing, G., Cohen, D., Dube, V., Gauch, M., Gilon, O., Harrigan, S., Hassidim, A., Klotz,  
235 D., Kratzert, F., Metzger, A., Nevo, S., Pappenberger, F., Prudhomme, C., Shalev,  
236 G., Shenzis, S., Tekalign, T. Y., Weitzner, D., & Matias, Y. (2024). Global prediction  
237 of extreme floods in ungauged watersheds. *Nature*, 627(8004), 559–563.  
238 <https://doi.org/10.1038/s41586-024-07145-1>

239
